# Supplementary material for: Association Between Beta-Carotene Supplementation and Mortality: A Systematic Review and Meta-Analysis of Randomized Controlled Trials
Source: PubMed Central journal article supplement (PMC9343755; doi:10.3389/fmed.2022.872310), 2022-07-19
Supplement: Table_1.pdf [file Table_1.pdf]

| Studies                  | Random sequence generation | Allocation concealment | Blinding of participants and personnel | Blinding of outcome assessment | Incomplete outcome data (attrition bias) | Selective reporting |
|--------------------------|----------------------------|------------------------|----------------------------------------|--------------------------------|------------------------------------------|---------------------|
| Austin 2006              | Low                        | Low                    | Low                                    | Low                            | Low                                      | Low                 |
| Bairati 2006             | Low                        | Low                    | Low                                    | Low                            | Low                                      | Low                 |
| HATS 2001                | Low                        | Low                    | Low                                    | Low                            | Low                                      | Low                 |
| AREDS 2013               | Low                        | Low                    | Low                                    | Low                            | Low                                      | Low                 |
| REACT 2002               | Low                        | Low                    | Low                                    | Low                            | Low                                      | Low                 |
| De Klark 1998            | Low                        | Low                    | Low                                    | Low                            | Unclear                                  | Low                 |
| Garbagnati 2009          | Low                        | Low                    | Low                                    | Low                            | Low                                      | Low                 |
| PHS II 2012              | Low                        | Low                    | Low                                    | Low                            | Low                                      | Low                 |
| Girodon 1999             | Low                        | Low                    | Low                                    | Low                            | Low                                      | Low                 |
| CARET 2004               | Low                        | Low                    | Low                                    | Low                            | Low                                      | Low                 |
| Graat 2002               | Low                        | Low                    | Low                                    | Low                            | Low                                      | Low                 |
| SCPS 1996                | Low                        | Low                    | Low                                    | Low                            | Low                                      | Low                 |
| Grieger 2009             | Low                        | Low                    | Low                                    | Low                            | Low                                      | Low                 |
| HPS 2002                 | Low                        | Low                    | Low                                    | Low                            | Low                                      | Low                 |
| PHS 1996                 | Low                        | Low                    | Low                                    | Low                            | Low                                      | Low                 |
| SUVIMAX 2010             | Low                        | Low                    | Low                                    | Low                            | Low                                      | Low                 |
| Jiamton 2003             | Low                        | Low                    | Low                                    | Low                            | Low                                      | Low                 |
| TACT 2013                | Low                        | Low                    | Low                                    | Low                            | Low                                      | Low                 |
| WHS 1999                 | Low                        | Low                    | Low                                    | Low                            | Low                                      | Low                 |
| NIT2 1993                | Low                        | Low                    | Low                                    | Low                            | Low                                      | Low                 |
| WACS 2009                | Low                        | Low                    | Low                                    | Low                            | Low                                      | Low                 |
| Liu 2007                 | Low                        | Low                    | Low                                    | Low                            | Low                                      | Low                 |
| Mayne 2001               | Unclear                    | Unclear                | Low                                    | Low                            | Low                                      | Low                 |
| Papadimitrakopoulou 2009 | Unclear                    | Unclear                | High                                   | Low                            | Low                                      | Low                 |
| AREDS2 2018              | Low                        | Low                    | Low                                    | Low                            | Low                                      | Low                 |
| Pathak 2005              | Low                        | Low                    | High                                   | Low                            | Low                                      | Low                 |
| Phillips 2006            | Low                        | Low                    | High                                   | Low                            | Low                                      | Low                 |
| Plummer 2007             | Low                        | Low                    | Low                                    | Low                            | Low                                      | Low                 |
| Prince 2003              | Low                        | Low                    | Low                                    | Low                            | Low                                      | Low                 |
| LAST 2004                | Low                        | Low                    | Low                                    | Low                            | Low                                      | Low                 |
| Toma 2003                | Low                        | Low                    | High                                   | Low                            | Low                                      | Low                 |
| ATBC 2003                | Low                        | Low                    | Low                                    | Low                            | Low                                      | Low                 |

NIT1 2018

Low

Low

Low

Low

High

Low

---

**Suppl Table 1**
